# Supplementary material for: Surface plasmon resonance based competitive immunoassay for Cd2+
Source: Royal Society of Chemistry journal article supplement (doi:10.1039/c7ra07635e), 2017-01-01
Supplement: c7ra07635e1.pdf [file c7ra07635e1.pdf]

## Supplementary information for Surface plasmon resonance based competitive immunoassay for Cd<sup>2+</sup>

Gai-feng Kang,<sup>‡a</sup> Yu-zhen Wang,<sup>‡\*b</sup> Yun-feng Bai,<sup>\*b</sup> Ze-zhong Chen<sup>b</sup> and Feng Feng<sup>\*a,b</sup>

*a* School of Chemistry and Materials Science, Shanxi Normal University, Linfen 041004, P. R. China. E-mail: feng-feng64@263.net; Fax: +86-352-610028; Tel: +86-352-7158662

*b* College of Chemistry and Environmental Engineering, Shanxi Datong University, Datong 037009, P. R. China. E-mail: wyz2099610@126.com; Fax: +86-352-610028; Tel: +86-352-7158662

<sup>‡</sup> These authors contributed equally to this work.

### Supplementary Figures

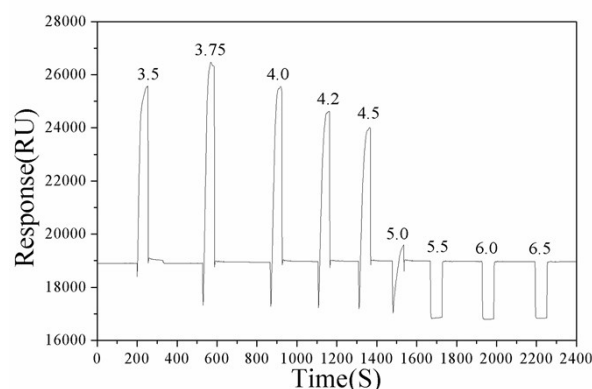

**Fig. s1** The corresponding signals were produced by the antigens diluted with the acetate buffer solution of different pH values (pH 3.5, 3.75, 4.0, 4.2, 4.5, 5.0, 5.5, 6.0, 6.5 from left to right).

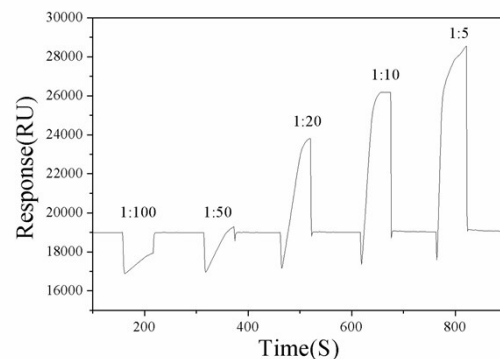

**Fig. s2** The corresponding signals were produced by the antigens of different dilution rates (1:100, 1:50, 1:20, 1:10, 1:5 from left to right) with pH 3.75 acetate buffer solution.

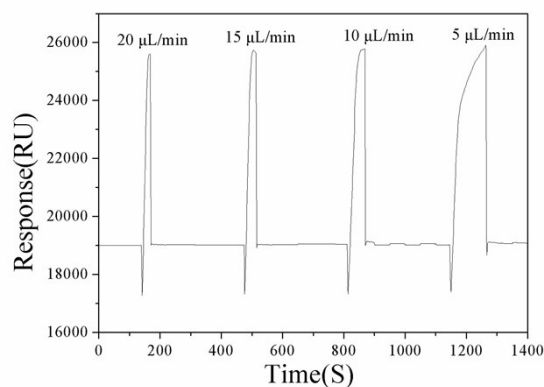

**Fig. s3** The corresponding signals were produced by antigen at different flow rates (5  $\mu\text{L}/\text{min}$ , 10  $\mu\text{L}/\text{min}$ , 15  $\mu\text{L}/\text{min}$ , 20  $\mu\text{L}/\text{min}$  flow rates from left to right).

**Table s1** Performance comparison of this work with other methods for  $\text{Cd}^{2+}$  detection

| Analytical method                        | Operation | Linear range<br>( $\mu\text{g L}^{-1}$ ) | Detection limit<br>( $\mu\text{g L}^{-1}$ ) | Real sample                          | Ref.      |
|------------------------------------------|-----------|------------------------------------------|---------------------------------------------|--------------------------------------|-----------|
| SPR Biosensor                            | Simple    | 3.57~758.37                              | 1.25                                        | Water samples                        | This work |
| Carbon Paste Electrode                   | Complex   | 67.4~3372                                | 9.0                                         | Water samples and people hair sample | 1         |
| Electrochemical Sensor                   | Complex   | 10~500                                   | 4.43                                        | Water samples                        | 2         |
| ELISA                                    | Complex   | Not reported                             | 1.95                                        | Wheat sample                         | 3         |
| Fluorescence Biosensor                   | Simple    | Not reported                             | 56.2                                        | Water samples                        | 4         |
| Naked-Eye Sensor                         | Simple    | 4.5~5001.8                               | 4.4                                         | Synthetic mixtures and water samples | 5         |
| Nonthermal Optical Emission Spectrometry | Complex   | 5~1000                                   | 1.5                                         | Not reported                         | 6         |
| Potentiometric Sensor                    | Simple    | 22.5~1.12 $\times 10^6$                  | 11.2                                        | Water samples                        | 7         |
| Fluorescent Sensor                       | Simple    | 112.4~1124                               | 31.0                                        | Cosmetic and personal care samples   | 8         |

## References

- 1 P. Zhang, S. Dong, G. Gu and T. Huang, *Bull. Korean Chem. Soc.*, 2010, **31**, 2949.
- 2 N. Promphet, P. Rattanasat, R. Rangkupan, O. Chailapakul and N. Rodthongkum, *Sens. Actuators B*, 2015, **207**, 526.
- 3 G. L. Liu, J. F. Wang, Z. Y. Li, S. Z. Liang, and X. N. Wang, *Biomedical and Environmental Sciences*, 2009, **22**, 188.
- 4 A. Varriale, M. Staiano, M'. Rossi, and S. D'Auria, *Anal. Chem.*, 2007, **79**, 5760.
- 5 D. Prabhakaran, M. Yuehong, H. Nanjo and H. Matsunaga, *Anal. Chem.*, 2007, **79**, 4056.
- 6 Y. Cai, Y. J. Zhang, D. F. Wu, Y. L. Yu and J. H. Wang, *Anal. Chem.*, 2016, **88**, 4192.
- 7 S. A. R. Ivani, A. Darroudi, M. H. A. Zavar, G. Zohuri and N. Ashraf, *Arabian J. Chem.*, 2017, **10**, S864.
- 8 R. Khani, E. Ghiamati, R. Boroujerdi, A. Rezaeifard and M. H. Zaryabi, *Spectrochim. Acta, Part A*, 2016, **163**, 120.
